# Factors Associated With Glucose and Insulin Levels in Healthy Postmenopausal Women

ELIZABETH BARRETT-CONNOR, MD  
HELMUT G. SCHROTT, MD  
GAIL GREENDALE, MD  
DONNA KRITZ-SILVERSTEIN, PHD

MARK A. ESPELAND, PHD  
MICHAEL P. STERN, MD  
TRUDY BUSH, PHD  
JEFFREY A. PERLMAN, MD

**OBJECTIVE** — Little is known about the covariates of hyperglycemia and hyperinsulinemia. We examined candidate factors in postmenopausal women.

**RESEARCH DESIGN AND METHODS** — We determined the cross-sectional associations of sociodemographic, body-size, lifestyle, reproductive, and menopausal factors with pre-trial fasting and postchallenge glucose and insulin levels in 869 postmenopausal women aged 45–65 years. Women were participants in the Postmenopausal Estrogen/Progestin Interventions study who were not taking estrogen or insulin.

**RESULTS** — Plasma glucose levels increased significantly with age; serum insulin levels did not. BMI and waist-to-hip ratio (WHR) each showed graded positive and independent associations with glucose and insulin levels. Alcohol intake, cigarette smoking, physical activity, parity, education, and income were also associated with insulin or glucose in age-adjusted models. In multivariable models, BMI and WHR explained 18% of the variability in fasting glucose, 16% in postchallenge glucose, 28% in fasting insulin, and 17% in postchallenge insulin. Age and all other factors combined accounted for <6% of the variance in glucose or insulin. In multiply adjusted models, African-American and Hispanic women had higher fasting and 2-h insulin levels than non-Hispanic white women.

**CONCLUSIONS** — Most of the variance in glycemia and insulin is unexplained. Measures of obesity and fat distribution account for nearly all the explained variance.

Diabetes and impaired glucose tolerance are associated with hyperinsulinemia and an increased risk of heart disease (1–3), but few studies have systematically examined factors associated with glycemia or hyperinsulinemia in women. The best known covariates of serum insulin levels are obesity, particularly central (abdominal) obesity, and abnormal carbohydrate tolerance (4), but there is an approximately fourfold variation in insulin-stimulated glucose uptake in hyperinsulinemic individuals with nor-

mal glucose tolerance (5). It is uncertain whether other possible covariates, such as physical activity and parity, affect glucose and insulin levels independently or via an effect on obesity and fat pattern (6). Oral contraceptives may worsen glucose tolerance (7–9), whereas postmenopausal estrogen may have a salutary effect (10,11). However, the consequences of prior use of contraceptive and noncontraceptive hormones on glucose and insulin levels are unknown.

We report here the factors associ-

ated with prandomization glucose and insulin levels in 869 healthy postmenopausal women from the Postmenopausal Estrogen/Progestin Interventions (PEPI) trial.

## RESEARCH DESIGN AND METHODS

A detailed description of the PEPI trial appears elsewhere (12–15). Briefly, postmenopausal women were recruited from seven communities (for location and investigators, see APPENDIX). All were ambulatory and gave written informed consent. Menopausal status was based on years since last menstrual period and elevated follicle-stimulating hormone level. Women who were currently taking insulin or who had taken estrogen within the past 3 months were not included. Exclusion criteria possibly relevant to glucose tolerance included BMI  $\geq 40$ , blood pressure  $\geq 160$  mmHg systolic or  $\geq 95$  diastolic, fasting plasma glucose levels  $\geq 140$  mg/dl ( $\geq 7.7$  mmol/l), and triglyceride levels  $\geq 400$  mg/dl (4.5 mmol/l).

A standard 75-g oral glucose tolerance test was performed between 7:00 and 11:00 A.M. after a 12-h fast; women were instructed to take 5–10 min to consume the glucose drink. Venous blood for glucose was collected in EDTA tubes, placed on ice immediately, and centrifuged within 20 min. Blood for insulin was centrifuged after ~45 min at room temperature. Frozen plasma and insulin were mailed on dry ice to the PEPI Central Insulin/Glucose Laboratory at the University of Indiana. Plasma glucose was measured using a colorimetric glucose oxidase method after Somogyi precipitation (16). The interassay coefficients of variation during PEPI analyses, based on Boehringer Mannheim Diagnostics control pools, were 2.0 and 1.8% for target glucose values of 71 and 290 mg/dl, respectively. Serum insulin levels were assayed in duplicate using a minor modification of a double antibody method (17). Based on analysis of Bio-Rad control pools, interassay coefficients of variation were 29, 14, and 13% for insulin target

From the University of California, San Diego (E.B.C., D.K.-S.), La Jolla; and the University of California, Los Angeles (G.G.), Los Angeles, California; the University of Iowa (H.G.S.), Iowa City, Iowa; the Bowman Gray School of Medicine (M.A.E.), Winston-Salem, North Carolina; the University of Texas Health Sciences Center (M.P.S.), San Antonio, Texas; Johns Hopkins University (T.B.), Baltimore, Maryland; and the National Cancer Institute (J.A.P.), Bethesda, Maryland.

Address correspondence and reprint requests to Elizabeth Barrett-Connor, MD, Department of Family and Preventive Medicine, University of California, San Diego, 9500 Gilman Dr., La Jolla, CA 92093-0607.

Received for publication 21 February 1995 and accepted in revised form 13 November 1995.

PEPI, Postmenopausal Estrogen/Progestin Interventions; WHR, waist-to-hip ratio.

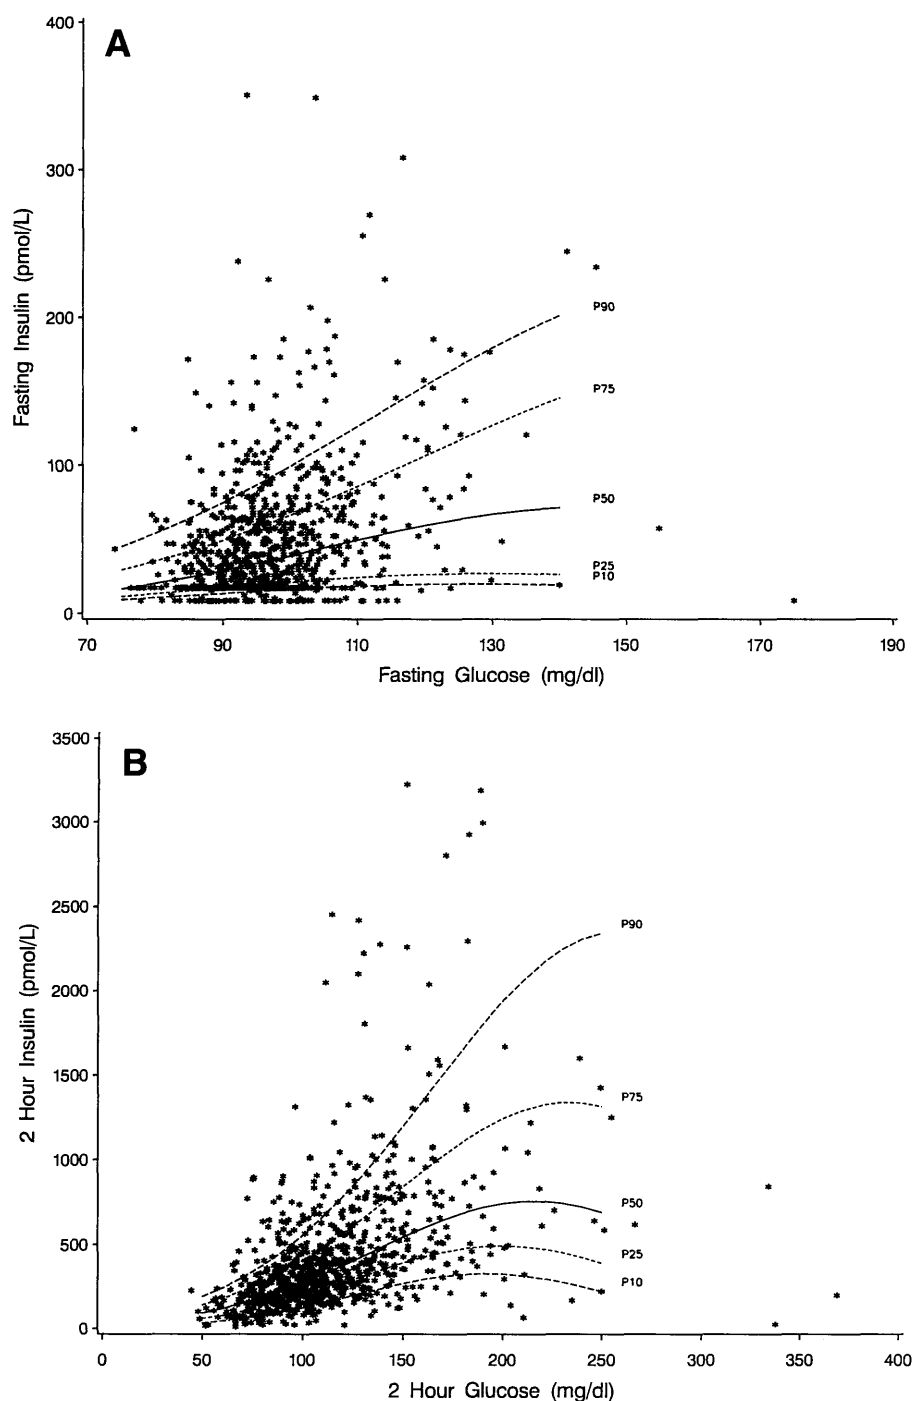

**Figure 1**—Correlation of fasting insulin with fasting glucose (A) ( $r = 0.30$ ;  $P < 0.0001$ ) and 2-h insulin with 2-h glucose (B) ( $r = 0.25$ ;  $P < 0.0001$ ).

values of 0.28, 1.7, and 3.7 ng/ml, respectively.

Other relevant covariates were determined by standardized interview. Cigarette smoking was reported as current, past, and never. Alcohol intake was reported as never, past, and current drinks per day. Customary physical activity dur-

ing the past 12 months was classified for home, work, and leisure activity as none, light, moderate, or heavy, based on examples of each level of activity given in the questionnaire. Height, weight, and waist and hip circumferences were measured with subjects wearing light clothing and no shoes. BMI was used as an estimate of

obesity, and waist-to-hip ratio (WHR) was used as an estimate for central obesity.

### Statistical analysis

Only factors associated with fasting and 2-h glucose are reported, because the inclusion of 1-h values and the area under the curve added little information. Because insulin levels were positively skewed, analyses of these data were performed on logarithms; means, percentile contours, and standard deviations (18) were transformed back to their original scales. Percentile contours for insulin versus glucose levels were constructed using asymmetric least squares regression with quadratic models (19). Two insulin data points  $>5,000$  pmol/l were excluded.

Analyses of covariance were used to assess the univariate relationships each graded or discrete predictor had with glucose and insulin after controlling for age. Least squares regression was used to assess the independent contribution of factors predicting glucose and insulin levels. Relationships with age, BMI, and WHR were first explored. Forward stepwise selection was then used to add additional predictors to the models in the order in which they contributed the most to prediction (in terms of  $R^2$ ). All factors associated with a nominal  $P$  value  $<0.10$  were included.

**RESULTS**—The average age of the 869 women was 56 years (range 45–65). There was a positive, graded, and significant relation between age and plasma glucose ( $r = 0.16$ ,  $P < 0.0001$  for fasting glucose;  $r = 0.18$ ,  $P < 0.0001$  for 2-h glucose). No significant association between age and serum insulin was found ( $r = 0.03$ ,  $P = 0.46$  for fasting insulin;  $r = 0.06$ ,  $P = 0.08$  for 2-h insulin). By design, few women had NIDDM; 0.5% had fasting glucose levels of  $\geq 140$  mg/dl, and 2.8% had 2-h glucose levels of  $\geq 200$  mg/dl. As shown in Fig. 1, insulin levels increased in parallel with glucose levels until postchallenge glucose levels exceeded 200 mg/dl.

### Age-adjusted covariates of glucose and insulin

Tables 1 and 2 show the age-adjusted fasting and 2-h glucose and insulin levels for all women by sociodemographic characteristics (education level, ethnicity/race, and family income) and BMI and WHR

Table 1—Age-adjusted mean fasting and 2-h glucose and insulin levels for sociodemographic, obesity, and fat-distribution factors

|                      | n   | Fasting glucose<br>(mg/dl) | 2-h glucose<br>(mg/dl) | Fasting insulin<br>(pmol/l) | 2-h insulin<br>(pmol/l) |
|----------------------|-----|----------------------------|------------------------|-----------------------------|-------------------------|
| Education            |     |                            |                        |                             |                         |
| Grade school         | 25  | 99.4 ± 9.8                 | 129.5 ± 41.7           | 35.4 ± 28.0                 | 370.2 ± 285.4           |
| High school graduate | 481 | 97.6 ± 9.3                 | 116.3 ± 35.9           | 37.9 ± 28.4                 | 326.2 ± 265.1           |
| College graduate     | 222 | 96.4 ± 10.6                | 109.0 ± 35.1           | 32.9 ± 25.2                 | 308.9 ± 215.8           |
| Postcollege graduate | 135 | 96.4 ± 9.4                 | 111.1 ± 34.8           | 30.7 ± 27.1                 | 260.5 ± 232.8           |
| P                    |     | 0.06                       | 0.0006                 | 0.003                       | 0.003                   |
| Ethnicity/race       |     |                            |                        |                             |                         |
| Black                | 32  | 99.2 ± 11.1                | 116.7 ± 29.1           | 54.4 ± 46.5                 | 458.4 ± 334.8           |
| Hispanic             | 44  | 99.4 ± 10.0                | 132.4 ± 40.7           | 51.9 ± 31.4                 | 511.2 ± 361.5           |
| Other                | 19  | 100.0 ± 10.8               | 121.0 ± 33.5           | 31.1 ± 25.5                 | 379.2 ± 204.5           |
| Non-Hispanic white   | 768 | 96.9 ± 9.6                 | 112.6 ± 35.7           | 34.0 ± 26.0                 | 296.7 ± 237.2           |
| P                    |     | 0.11                       | 0.003                  | <0.0001                     | <0.0001                 |
| Family income        |     |                            |                        |                             |                         |
| <\$20,000            | 91  | 99.6 ± 14.5                | 123.4 ± 48.4           | 36.6 ± 28.4                 | 300.9 ± 230.6           |
| \$20,000–\$49,999    | 365 | 97.7 ± 9.4                 | 114.9 ± 34.2           | 36.1 ± 27.8                 | 319.4 ± 267.0           |
| \$50,000–\$74,999    | 300 | 96.1 ± 9.0                 | 111.5 ± 32.8           | 34.4 ± 27.8                 | 307.1 ± 231.8           |
| ≥\$75,000            | 88  | 96.6 ± 7.0                 | 109.8 ± 32.8           | 33.8 ± 25.5                 | 312.0 ± 268.5           |
| P                    |     | 0.005                      | 0.0006                 | 0.32                        | 0.93                    |
| BMI                  |     |                            |                        |                             |                         |
| 1st <23.52           | 288 | 94.1 ± 7.8                 | 104.6 ± 30.9           | 25.7 ± 16.6                 | 230.4 ± 161.0           |
| 2nd 23.52–27.23      | 288 | 96.5 ± 9.0                 | 111.1 ± 29.7           | 30.1 ± 20.5                 | 303.6 ± 209.5           |
| 3rd >27.23           | 287 | 100.8 ± 10.8               | 126.1 ± 42.3           | 56.4 ± 43.7                 | 431.0 ± 375.4           |
| P                    |     | 0.0001                     | <0.0001                | <0.0001                     | <0.0001                 |
| WHR                  |     |                            |                        |                             |                         |
| 1st <0.759           | 288 | 94.1 ± 7.2                 | 103.4 ± 27.9           | 25.5 ± 16.3                 | 239.7 ± 168.0           |
| 2nd 0.759–0.811      | 288 | 96.2 ± 9.0                 | 110.6 ± 31.7           | 33.4 ± 24.4                 | 288.2 ± 224.5           |
| 3rd >0.811           | 287 | 101.2 ± 11.1               | 127.9 ± 42.2           | 51.8 ± 41.1                 | 439.0 ± 349.1           |
| P                    |     | <0.0001                    | <0.0001                | <0.0001                     | <0.0001                 |

Data are means ± SD.

(Table 1); lifestyle characteristics (alcohol use, activity level, and smoking status); and reproductive/menopause history, hysterectomy status, and prior use of contraceptive and noncontraceptive estrogen (Table 2). *P* values are from analyses of covariance.

As shown, mean levels of fasting and postchallenge insulin and glucose increased significantly with increasing BMI and WHR. African-American (*n* = 32) and Hispanic (*n* = 47) participants, who tended to have higher BMI and more central obesity, had higher glucose and insulin levels than non-Hispanic white (*n* = 775) women. Lower attained education levels were associated with higher levels of fasting and postchallenge glucose and insulin. Lower family incomes were associated with significantly higher levels of glucose but not insulin. Alcohol use was inversely associated with insulin levels. Increasing levels of reported activity were associated with lower glucose and post-

challenge insulin levels. Former and current smokers had slightly lower levels of postchallenge glucose than subjects who were never smokers. Increasing parity was associated with higher fasting and postchallenge insulin levels.

#### Multiply adjusted covariates of glucose and insulin

Figure 2 shows that in age-adjusted comparisons, each increasing tertile of BMI and WHR was independently associated with a significant increment in fasting and postchallenge glucose and insulin levels. In multivariable models (Table 3), BMI and WHR were by far the most important predictors of fasting and postchallenge glucose and insulin concentrations. Together they accounted for ~18% of the variability in fasting glucose, 16% in postchallenge glucose, 28% in fasting insulin, and 17% in postchallenge insulin, while age and other covariates explained at most an additional 6%. Ethnicity was

predictive of both fasting and 2-h insulin levels independent of BMI and WHR. Adjusted mean fasting and 2-h insulin levels were higher for African-Americans ( $42.1 \pm 5.1$  pmol/l,  $378.2 \pm 49.3$  pmol/l) and Hispanics ( $45.1 \pm 4.6$  pmol/l,  $450.5 \pm 49.6$  pmol/l) compared with non-Hispanic whites ( $34.7 \pm 0.8$  pmol/l,  $301.4 \pm 7.9$  pmol/l). The only other extrinsic factor independently associated with insulin level was a significant positive correlation between past estrogen replacement therapy and postchallenge insulin.

After controlling for age, BMI, and WHR, alcohol use was positively and independently associated with fasting glucose (Table 3). Adjusted means ± SE from the regression model were  $96.3 \pm 0.7$  mg/dl (never drinkers),  $97.1 \pm 0.8$  mg/dl (former drinkers),  $96.9 \pm 0.4$  mg/dl (<1 drink per day), and  $98.9 \pm 0.8$  mg/dl (≥1 drink per day). Increased physical activity had a modest association

Table 2—Age-adjusted mean fasting and 2-h glucose and insulin levels for reproductive, menopausal, prior-hormone-use, and lifestyle factors

|                                    | n   | Fasting glucose<br>(mg/dl) | 2-h glucose<br>(mg/dl) | Fasting insulin<br>(pmol/l) | 2-h insulin<br>(pmol/l) |
|------------------------------------|-----|----------------------------|------------------------|-----------------------------|-------------------------|
| Age at menopause                   |     |                            |                        |                             |                         |
| 40–49 years                        | 194 | 97.4 ± 8.3                 | 113.4 ± 33.1           | 37.1 ± 28.3                 | 309.1 ± 248.5           |
| ≥50 years                          | 396 | 96.8 ± 10.0                | 111.9 ± 37.8           | 33.9 ± 25.4                 | 293.5 ± 238.8           |
| P                                  |     | 0.50                       | 0.63                   | 0.30                        | 0.47                    |
| Hysterectomy status                |     |                            |                        |                             |                         |
| Uterus present                     | 278 | 97.3 ± 10.2                | 117.2 ± 34.7           | 37.9 ± 28.4                 | 301.1 ± 249.8           |
| Uterus absent                      | 585 | 97.1 ± 9.5                 | 112.4 ± 36.4           | 34.9 ± 26.7                 | 321.5 ± 249.3           |
| P                                  |     | 0.70                       | 0.07                   | 0.67                        | 0.23                    |
| Parity                             |     |                            |                        |                             |                         |
| None                               | 116 | 97.3 ± 10.6                | 110.9 ± 34.2           | 30.6 ± 25.2                 | 272.7 ± 231.4           |
| 1                                  | 70  | 95.7 ± 6.7                 | 112.3 ± 30.8           | 33.6 ± 28.2                 | 286.4 ± 207.6           |
| 2                                  | 206 | 97.5 ± 10.3                | 113.1 ± 39.5           | 34.4 ± 28.3                 | 305.7 ± 250.3           |
| 3                                  | 211 | 96.7 ± 8.6                 | 113.5 ± 31.0           | 35.4 ± 26.4                 | 331.6 ± 259.9           |
| 4+                                 | 260 | 97.7 ± 10.3                | 116.8 ± 38.6           | 38.8 ± 29.5                 | 327.4 ± 259.0           |
| P                                  |     | 0.50                       | 0.12                   | 0.005                       | 0.02                    |
| Prior estrogen replacement therapy |     |                            |                        |                             |                         |
| No                                 | 406 | 97.6 ± 10.4                | 113.1 ± 57.7           | 35.7 ± 28.4                 | 301.1 ± 249.8           |
| Yes                                | 457 | 96.8 ± 9.1                 | 114.7 ± 34.2           | 34.9 ± 26.7                 | 321.5 ± 249.3           |
| P                                  |     | 0.23                       | 0.52                   | 0.67                        | 0.23                    |
| Alcohol use                        |     |                            |                        |                             |                         |
| Never                              | 154 | 96.5 ± 10.7                | 115.6 ± 35.0           | 38.0 ± 32.0                 | 338.2 ± 271.0           |
| Former                             | 117 | 97.8 ± 9.7                 | 114.0 ± 34.2           | 37.7 ± 28.9                 | 338.7 ± 310.0           |
| <1 per day                         | 440 | 96.8 ± 9.3                 | 113.8 ± 36.6           | 35.0 ± 26.9                 | 308.6 ± 233.1           |
| ≥1 per day                         | 145 | 98.4 ± 9.6                 | 112.7 ± 36.4           | 31.5 ± 23.8                 | 272.8 ± 224.3           |
| P                                  |     | 0.25                       | 0.49                   | 0.03                        | 0.01                    |
| Activity level                     |     |                            |                        |                             |                         |
| Low                                | 309 | 98.2 ± 10.7                | 118.6 ± 41.1           | 36.0 ± 29.3                 | 340.9 ± 287.5           |
| Medium                             | 346 | 97.5 ± 9.6                 | 111.9 ± 32.1           | 35.6 ± 26.6                 | 309.8 ± 235.6           |
| High                               | 207 | 95.1 ± 7.9                 | 110.8 ± 35.7           | 33.9 ± 26.5                 | 276.3 ± 217.0           |
| P                                  |     | 0.0008                     | 0.01                   | 0.40                        | 0.003                   |
| Smoking                            |     |                            |                        |                             |                         |
| Never                              | 424 | 96.9 ± 9.8                 | 154.2 ± 41.9           | 36.0 ± 28.1                 | 328.1 ± 254.0           |
| Former                             | 320 | 97.0 ± 9.8                 | 146.2 ± 45.1           | 35.3 ± 28.6                 | 301.2 ± 254.6           |
| Current                            | 117 | 98.2 ± 9.2                 | 150.9 ± 47.2           | 32.9 ± 22.5                 | 283.2 ± 209.4           |
| P                                  |     | 0.043                      | 0.05                   | 0.53                        | 0.13                    |

Data are means ± SD.

with lower fasting glucose levels in addition to what could be explained by age, obesity, and WHR (Table 3). Adjusted mean fasting glucose levels were  $97.3 \pm 0.5$  mg/dl (low activity),  $97.7 \pm 0.5$  mg/dl (moderate activity), and  $96.0 \pm 0.6$  mg/dl (high activity). Smoking was associated with lower levels of postchallenge glucose after controlling for age and BMI (Table 3). Adjusted mean 2-h glucose levels were  $108.6 \pm 3.2$  mg/dl and  $110.1 \pm 1.9$  mg/dl for current and former smokers compared with  $118.2 \pm 1.7$  for subjects who were never smokers. In addition, low educational attainment continued to be associated with increased postchallenge

glucose (Table 3). Fitted mean 2-h glucose levels were  $129.6 \pm 6.8$  for women who were not high school graduates compared with  $114.8 \pm 6.8$  mg/dl,  $110.7 \pm 2.3$ , and  $113.0 \pm 3.0$  for high school, college, and postcollege graduates, respectively.

Although glucose concentrations were strongly associated with fasting and, in particular, postchallenge insulin levels, BMI and WHR continued to exhibit strong independent relationships ( $P \leq 0.0001$ ) with insulin levels after controlling for glucose. Ethnic differences also persisted after adding glucose to the model.

**CONCLUSIONS**— Although it is well known that obesity, particularly central obesity, is associated with hyperinsulinemia and insulin resistance even when normal carbohydrate tolerance is maintained (4,5,20), there are only a few reported studies of insulin and glucose metabolism in postmenopausal women. In the PEPI women, BMI and WHR were each independently associated with fasting and postchallenge glucose and insulin levels and were the most important independent predictors in most models. BMI and WHR combined explained 18% of the variance in fasting glucose, 16% of the variance in 2-h glucose, 28% of the vari-

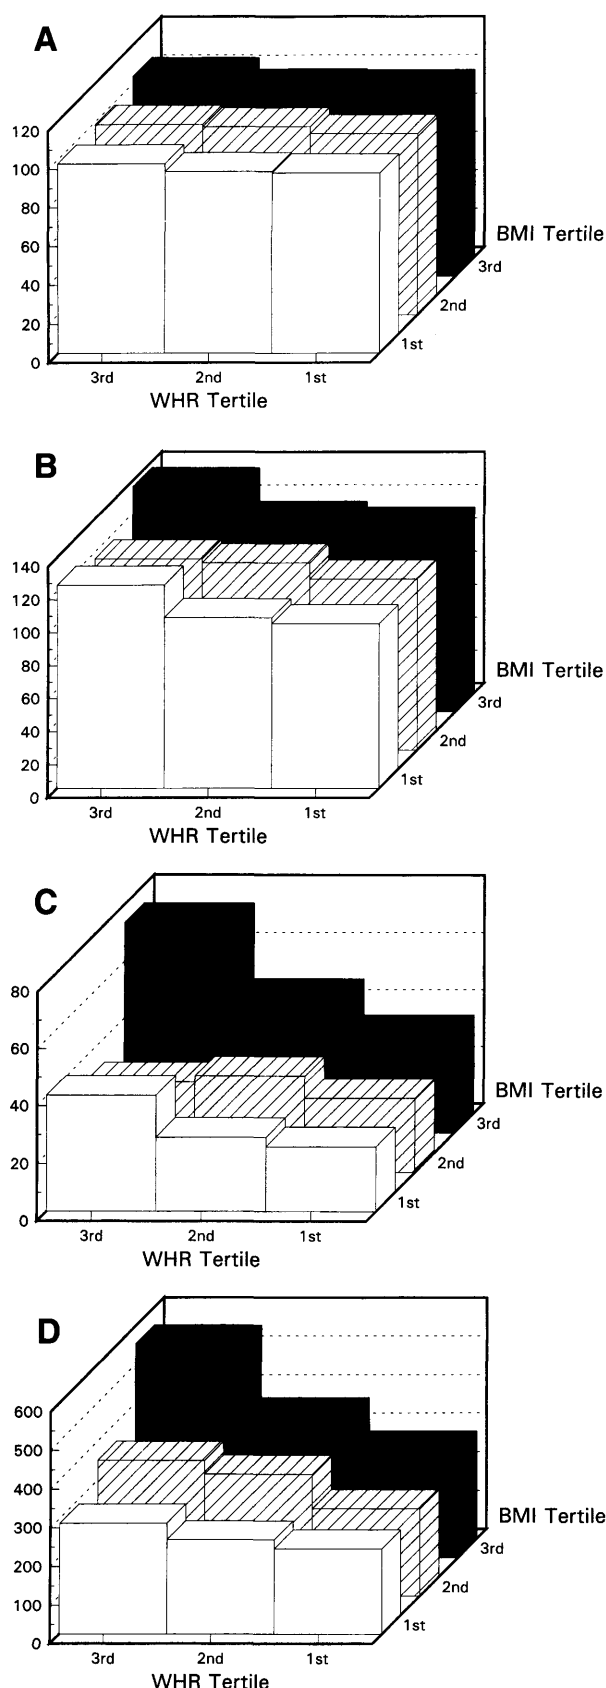

**Figure 2**—Mean fasting (A) and 2-h (B) glucose and mean fasting (C) and 2-h (D) insulin by BMI and WHR.

ance in fasting insulin, and 17% of the variance in 2-h insulin. Age and all other covariates explained <6% of the variance in glucose or insulin. These results are concordant with other studies showing that BMI and WHR were each independently associated with fasting and 2-h postchallenge insulin levels in older women (21–24).

Given that obesity and WHR are the most critical known determinants of glucose and insulin levels, the central question then becomes whether any other factors contribute to altered carbohydrate metabolism and insulin levels—independent of their association with overweight and fat distribution. In the PEPI women, several lifestyle factors related to obesity and central obesity, such as physical activity, alcohol intake, cigarette smoking, and parity, were associated with insulin and glucose levels when unadjusted for BMI and WHR, but the addition of these attributes to the obesity- and WHR-adjusted models contributed little additional information to the prediction of carbohydrate metabolism.

Considerable evidence, including small clinical trials (25–29), suggests that strenuous physical activity can reduce or prevent hyperinsulinemia. However, most studies failed to control for obesity, and even fewer described women. In New Zealand, women reporting regular heavy exercise had significantly lower insulin levels than sedentary women, but this association did not persist in a model adjusted for BMI, skinfold thickness, and glycemia (23). In Allegheny County women, higher reported activity levels were associated with lower 2-h insulin levels; this difference remained after adjusting for BMI, but not after adjusting for weight change (30). Failure to find an insulin–physical activity association independent of body size in this and other studies may reflect the fact that the effect is mediated by exercise-induced changes in obesity and fat distribution. If so, then adjusting for BMI and WHR in the present analysis underestimates the true effect of exercise. Reported physical activity may be particularly difficult to quantify in women, because their physical activity is more home and less sports related (31). In so far as exercise is misclassified, its effect would tend to be obscured by BMI and WHR, which can be measured more reliably. From a public health point of view, it does not matter whether exercise works

Table 3—Multivariable associations of risk factors (all variables listed in Table 1) with fasting and 2-h glucose and insulin

| Predictors     | Fasting glucose |                        | 2-h glucose |                        | Fasting insulin |                        | 2-h insulin |                        |
|----------------|-----------------|------------------------|-------------|------------------------|-----------------|------------------------|-------------|------------------------|
|                | P value         | Partial R <sup>2</sup> | P value     | Partial R <sup>2</sup> | P value         | Partial R <sup>2</sup> | P value     | Partial R <sup>2</sup> |
| Age            | <0.0001         | 0.024                  | <0.0001     | 0.030                  | —               | —                      | —           | —                      |
| BMI            | <0.0001         | 0.105                  | <0.0001     | 0.076                  | <0.0001         | 0.222                  | <0.0001     | 0.113                  |
| WHR            | <0.0001         | 0.074                  | <0.0001     | 0.084                  | <0.0001         | 0.057                  | <0.0001     | 0.054                  |
| BMI * WHR      | 0.001           | 0.013                  | —           | —                      | 0.01            | 0.005                  | —           | —                      |
| Ethnicity      | —               | —                      | —           | —                      | 0.01            | 0.009                  | 0.002       | 0.014                  |
| Alcohol use    | 0.05            | 0.007                  | —           | —                      | —               | —                      | —           | —                      |
| Activity level | 0.07            | 0.005                  | —           | —                      | —               | —                      | —           | —                      |
| Smoking        | —               | —                      | 0.001       | 0.013                  | —               | —                      | —           | —                      |
| Education      | —               | —                      | 0.04        | 0.008                  | —               | —                      | —           | —                      |
| Prior ERT      | —               | —                      | —           | —                      | —               | —                      | 0.02        | 0.005                  |
| Others         | —               | 0.014                  | —           | 0.012                  | —               | 0.014                  | —           | 0.023                  |
| Total          | —               | 0.242                  | —           | 0.223                  | —               | 0.307                  | —           | 0.209                  |

WHR includes both WHR and the square of WHR. BMI \* WHR includes both the product of BMI with WHR and the product of BMI with the square of WHR. ERT, estrogen replacement therapy.

through an effect on obesity, muscle mass, or some other mechanism.

Alcohol intake and cigarette smoking were the only behaviors assessed in PEPI women that were independently associated with insulin or glucose levels. In regression models, women who smoke or drink alcohol tend to be leaner than nondrinking women and to have larger WHRs (32–34); this may be why some associations were more apparent after adjusting for obesity and fat distribution. The mechanism for the positive association of alcohol intake with fasting glucose levels, also reported in two other cross-sectional studies (35,36), is unknown. PEPI women with higher alcohol intake also had significantly lower fasting and 2-h insulin levels than nondrinkers, findings similar to those of a study of British women (37). However, the alcohol-insulin association in PEPI women was no longer present in models adjusted for obesity or WHR, compatible with the observation that alcohol may increase WHR (32).

Parity was not independently associated with glucose or insulin levels after adjusting for obesity and WHR, in contrast to some previous reports (38,39) but concordant with another study (40). None of the other factors associated with reproductive or menopausal history, except past use of noncontraceptive estrogen, were independent predictors of insulinemia or glycemia after adjusting for BMI and WHR, but this cross-sectional

study would not be able to detect the increased insulin secretion and decreased insulin elimination reported in healthy estrogen-deficient postmenopausal women (41) or the transience of remote hormonal effects on insulin resistance (42,43). PEPI women were well beyond the age of discontinuing any oral contraceptive use, until recently proscribed for use after 40 years of age. The relevance of the weak independent estrogen-insulin association when estrogen had not been used for at least 3 months before the glucose tolerance test is uncertain; this association was only apparent after multivariable analysis.

In this large sample of postmenopausal women, most of whom were not obese, about two-thirds of the variance in glucose and insulin levels was unexplained. It is possible that more of the variance would be explained using more precise measures of obesity and fat distribution than BMI and WHR. Because women with uncontrolled hypertension, diabetes, or morbid obesity were excluded from the PEPI study, these observations do not necessarily apply to unrestricted population samples. Nevertheless, the higher insulin levels in African-Americans and Hispanics, independent of BMI, WHR, and family income, are similar to those in other reports (22,44,45). Further studies are necessary to delineate the role of ethnicity, genetics, and other factors that determine glucose tolerance in women.

**Acknowledgments**— The PEPI trial was supported by cooperative agreement research grants U01-HL40154, U01-HL40185, U01-HL40195, U01-HL40205, U01-HL40207, U01-HL40231, U01-HL40232, and U01-HL40273 from the National Heart, Lung, and Blood Institute; the National Institute of Child Health and Human Development; the National Institute of Arthritis and Musculoskeletal and Skin Diseases; the National Institute of Diabetes and Digestive and Kidney Diseases; and the National Institute on Aging.

## APPENDIX — KEY PEPI PERSONNEL

### Clinical Centers

**George Washington University.** Principal Investigator: Valery T. Miller, MD (Previously, John LaRosa, MD). Co-Investigators: Vanessa Barnabei, MD, PhD; Craig Kessler, MD. Key Personnel: Ginny Levin; Ann Smith-Roth; Margaret Griffin, RN, PA; Diane B. Stoy, RN, BS, PhD.

**Johns Hopkins University.** Principal Investigator: Trudy Bush, PhD. Co-Investigators: Howard Zacur, MD, PhD; David Foster, MD. Key Personnel: Jean Anderson, MD; Alice McKenzie, MS; Susan Miller, ScD.

**Stanford University.** Principal Investigator: Peter D. Wood, DSc. Co-Investigators: Marcia L. Stefanick, PhD; Robert Marcus, MD. Key Personnel: Allison Akana, PA; W. LeRoy Heinrichs, MD;

Charlene Kirchner, RD; Katherine O'Hanlan, MD; Melissa Ruyle.

**University of California, Los Angeles.** Principal Investigator: Howard L. Judd, MD. Co-Investigator: Gail Greendale, MD. Key Personnel: Richard Bayalos, MD; Kathy Lozano, RNP; Kathy Kawakami, RN.

**University of California, San Diego.** Principal Investigator: Elizabeth Barrett-Connor, MD. Co-Investigator: Robert Langer, MD. Key Personnel: Donna Kritzer-Silverstein, PhD; Mary Lou Carrion-Petersen, RN; Carmela Cavero, RN.

**University of Iowa.** Principal Investigator: Helmut G. Schrott, MD. Co-Investigator: Susan R. Johnson, MD. Key Personnel: Deborah A. Feddersen, RN; Denise L. Krutzfeldt; Jo Ann Benda, MD.

**The University of Texas Health Science Center, San Antonio.** Principal Investigator: Carl Pauerstein, MD. Co-Investigator: José Traval, MD. Key Personnel: Robert Schenken, MD; Michael P. Stern, MD; Mercedes Rodriguez-Sifuentes, RN; Carann Easton, RN.

#### Coordinating Center

**The Bowman Gray School of Medicine.** Principal Investigator: H. Bradley Wells, PhD. Co-Investigators: Mark Espeland, PhD; George Howard, DrPh; Robert Byington, PhD; Claudine Legault, PhD; Sally Shumaker, PhD. Key Personnel: Patricia Hogan, MS; Don Hire, BS; Carol Wasilauskas, MS; Margaret James, MS; Kathy Lane, BS; Tim Terrell, MS; Stephanie Reece, BS; June Pierce, AB; Mary Snow; Susan Anthony, BS.

**Participating Institutes of the National Institutes of Health**  
**National Heart, Lung, and Blood Institute.** Program Administrator: Irma L. Mebane-Sims, PhD. Key Personnel: Paula Einhorn, MD; Sally Hunsberger, PhD; Myron Waclawiw, PhD (Previously, Ken Lippel, PhD; Diane Lucas, PhD; Joel Verter, PhD; Sherry Jackson, MD).

**National Institute of Child Health and Human Development.** Liaison: Joseph Kelaghan, MD (Previously, Jeffrey Perlman, MD; Pam Wolf, PhD).

**National Institute of Arthritis and Musculoskeletal and Skin Diseases.** Liaison: Joan McGowan, PhD (Previously, Stephen Gordon, PhD; Stephen Heyse, MD).  
**National Institute of Diabetes and Digestive and Kidney Diseases.** Liaison: Judith Fradkin, MD.

**National Institute on Aging.** Liaison: Sherry Sherman, PhD (Previously, Lot Page, MD; Ann Sorenson, PhD).

#### Data and Safety Monitoring Board

Chairperson: Barbara Hulka, MD. Members: Baruch Brody, PhD; Ronald Burkman, MD; Robert Heaney, MD; Ronald Krauss, MD; Harold Roberts, MD; Janet Wittes, PhD (Previously, Lawrence Riggs, MD).

#### Central Facilities

**Drug Distribution Center.** Public Health Services, Health Resources and Services Administration, Supply Service Center: Cpt. Richard Moss

**Lipid Laboratory.** Northwest Lipid Research Center: John Albers, PhD; Santica Marcovina, PhD.

**Glucose/Insulin Laboratory.** Wishard Memorial Hospital: S. Edwin Fineberg, PhD.

**Hemostasis Laboratory.** University of Vermont: Russell P. Tracy, PhD.

**Pathology Laboratory.** National Cancer Institute: Maria Merino, MD.

**Pathology Arbiter.** Robert Scully, MD; Massachusetts General Hospital (Previously, Virginia Livolsi, MD).

**Laboratory Consultant.** Gerald Kessler, PhD; The Jewish Hospital of St. Louis.

#### References

- DeFronzo RA, Ferrannini E: Insulin resistance: a multifaceted syndrome responsible for NIDDM, obesity, hypertension, dyslipidemia, and atherosclerotic cardiovascular disease. *Diabetes Care* 14:173-194, 1991
- Reaven GM: Resistance to insulin-stimulated glucose uptake and hyperinsulinemia: role in non-insulin-dependent diabetes, high blood pressure, dyslipidemia and coronary heart disease. *Diabetes Metab* 17:78-86, 1991
- Stout RW: Insulin and atheroma: a 20-year perspective. *Diabetes Care* 13:631-654, 1990
- Golay A, Felber JP, Jequier E, DeFronzo RA, Ferrannini E: Metabolic basis of obesity and non-insulin dependent diabetes mellitus. *Diabetes Metab Rev* 4:727-747, 1988
- Hollenbeck C, Reaven GM: Variations in insulin-stimulated glucose uptake in healthy individuals with normal glucose tolerance. *J Clin Endocrinol Metab* 64:1169-1173, 1987
- Tuomilehto J, Knowler WC, Zimmet P: Primary prevention of non-insulin-

dependent diabetes mellitus. *Diabetes Metab Rev* 98:339-353, 1992

- Spellacy WN: Carbohydrate metabolism during treatment with estrogen, progestogen, and low-dose oral contraceptives. *Am J Obstet Gynecol* 142:732-734, 1982
- Wynn V: Effect of duration of low-dose oral contraceptive administration on carbohydrate metabolism. *Am J Obstet Gynecol* 142:739-746, 1982
- Perlman JA, Russell-Briefel R, Ezzati T, Lieberknecht G: Oral glucose tolerance and the potency of contraceptive progestins. *J Chronic Dis* 38:857-864, 1985
- Barrett-Connor E, Laakso M: Ischemic heart disease risk in postmenopausal women: effects of estrogen use on glucose and insulin levels. *Arteriosclerosis* 10:531-534, 1990
- Nabulsi AA, Folsom AR, White A, Patsch W, Heiss G, Wu KK, Szklo M: Association of hormone-replacement therapy with various cardiovascular risk factors in postmenopausal women. *N Engl J Med* 328:1069-1075, 1993
- Espeland MA, Bush TL, Mebane-Sims I, Stefanick ML, Johnson S, Sherwin R, Waclawiw M: Rationale, design, and conduct of the PEPI trial. *Controlled Clin Trials* 16:35-195, 1995
- Miller VT, Byington RL, Espeland MA, Langer R, Marcus R, Shumaker S, Stern MP: Baseline characteristics of the PEPI participants. *Controlled Clin Trials* 16:54S-65S, 1995
- Johnson S, Mebane-Sims I, Hogan PE, Stoy DB: Recruitment of postmenopausal women in the PEPI trial. *Controlled Clin Trials* 16:20S-35S, 1995
- Wood PD, Kessler G, Lippel K, Stefanick ML, Wasilauskas CH, Wells HB: Physical and laboratory measurements in the PEPI trial. *Controlled Clin Trials* 16:36S-53S, 1995
- Trinder P: Determination of glucose in blood using glucose oxidase with an alternative oxygen acceptor. *Ann Clin Biochem* 6:24-27, 1969
- Morgan CR, Lazarow A: Immunoassay of insulin: two antibody system: plasma levels of normal, subdiabetic and diabetic rats. *Diabetes* 12:115-126, 1963
- Aickin M: *Linear Statistical Analysis of Discrete Data*. New York, John Wiley, 1983
- Efron B: Regression percentiles using asymmetric squared error loss. *Statistica Sinica* 1:93-126, 1991
- Reaven GM, Hollenbeck CB, Chen YD: Relationship between glucose tolerance, insulin secretion, and insulin action in non-obese individuals with varying degrees of glucose tolerance. *Diabetologia* 32:52-55, 1989
- Wing RR, Matthews KA, Kuller LH, Smith D, Becker D, Plantinga PL, Meilahn EN: Environmental and familial contributions

- to insulin levels and change in insulin levels in middle-aged women. *JAMA* 268: 1890-1895, 1992
22. Haffner SM, Dunn JF, Katz MS: Relationship of sex hormone binding globulin to lipid, lipoprotein, glucose, and insulin concentrations in postmenopausal women. *Metabolism* 41:278-284, 1992
23. Campbell AJ, Busby WJ, Horwath CC, Robertson MC: Relation of age, exercise, anthropometric measurements, and diet with glucose and insulin levels in a population aged 70 years and over. *Am J Epidemiol* 138:688-696, 1993
24. Kohrt WM, Kirwan JP, Staten MA, Bourey RE, King DS, Holloszy JO: Insulin resistance in aging is related to abdominal obesity. *Diabetes* 42:273-281, 1993
25. Bjorntorp P, Fahlen M, Grimby G, Gustafson A, Holm J, Renstrom P, Schersten T: Carbohydrate and lipid metabolism in middle-aged, physically well-trained men. *Metabolism* 21:1037-1044, 1972
26. Bjorntorp P, de Jonge K, Sjostrom L, Sullivan L: Physical training in human obesity: effects on plasma insulin in glucose-intolerant subjects without marked hyperinsulinemia. *Scand J Clin Lab Invest* 32:41-45, 1973
27. Horton ES: Exercise and physical training: effects on insulin sensitivity and glucose metabolism. *Diabetes Metab Rev* 2:1-17, 1986
28. Kriska AM, Bennett PH: An epidemiological perspective of the relationship between physical activity and NIDDM: from activity assessment to intervention. *Diabetes Metab Rev* 8:355-372, 1992
29. Burstein R, Polychronakos C, Toews CJ, MacDougall D, Guyda HJ, Posner BI: Acute reversal of the enhanced insulin action in trained athletes: association with insulin receptor changes. *Diabetes* 34: 756-760, 1985
30. Wing RR, Bunker CH, Kuller LH, Matthews KA: Insulin, body mass index, and cardiovascular risk factors in premenopausal women. *Arteriosclerosis* 9:479-484, 1989
31. Jacobs DR, Ainsworth BE, Hartman TJ, Leon AS: A simultaneous evaluation of 10 commonly used physical activity questionnaires. *Med Sci Sports Exerc* 25:81-91, 1993
32. Laws A, Terry RB, Barrett-Connor E: Behavioral covariates of waist-to-hip ratio in Rancho Bernardo. *Am J Public Health* 80: 1358-1362, 1990
33. Stampfer MJ, Colditz GA, Willett WC, Manson JE, Arky RA, Hennekens CH, Speizer FE: A prospective study of moderate alcohol drinking and risk of diabetes in women. *Am J Epidemiol* 128:549-558, 1988
34. Holbrook T, Barrett-Connor E, Wingard DL: A prospective population-based study of alcohol use and non-insulin-dependent diabetes mellitus. *Am J Epidemiol* 132:902-909, 1990
35. Jose Gerard M, Klatsky AL, Siegelau AB, Friedman GD, Feldman R: Serum glucose levels and alcohol-consumption habits in a large population. *Diabetes* 26:780-785, 1977
36. Selby JV, Newman B, King MC, Friedman GD: Environmental and behavioral determinants of fasting plasma glucose in women: a matched co-twin analysis. *Am J Epidemiol* 125:979-988, 1987
37. Razay G, Heaton KW, Bolton CH, Hughes AO: Alcohol consumption and its relation to cardiovascular risk factors in British women. *Br Med J* 304:80-83, 1992
38. Kritz-Silverstein D, Barrett-Connor E, Wingard DL: The effect of parity on the later development of non-insulin-dependent diabetes mellitus or impaired glucose tolerance. *N Engl J Med* 321: 1214-1219, 1989
39. Kritz-Silverstein D, Barrett-Connor E, Wingard DL, Friedlander NJ: Relation of pregnancy history to insulin levels in older, nondiabetic women. *Am J Epidemiol* 140:375-382, 1994
40. Boyko EJ, Alderman BW, Keane EM, Baron AE: Effects of childbearing on glucose tolerance and NIDDM prevalence. *Diabetes Care* 13:848-854, 1990
41. Walton C, Godsland IF, Proudler AJ, Wynn V, Stevenson JC: The effects of the menopause on insulin sensitivity, secretion and elimination in non-obese, healthy women. *Eur J Clin Invest* 23:466-473, 1993
42. Kasdorf G, Kalkhoff R: Prospective studies of insulin sensitivity in normal women receiving oral contraceptive agents. *J Clin Endocrinol Metab* 66:846-852, 1988
43. Watanabe R, Azen C, Roy S, Perlman JA, Bergman RN: Defects in carbohydrate metabolism in oral contraceptive users without apparent metabolic risk factors. *J Clin Endocrinol Metab* 79:1277-1283, 1994
44. Haffner SM, Katz MS, Stern MP, Dunn JF: The relationship of sex hormones to hyperinsulinemia and hyperglycemia. *Metabolism* 37:683-688, 1988
45. Rewers M, Wagenknecht L, Watanabe RM: Insulin sensitivity in non-diabetic blacks, Hispanics, and non-Hispanic whites (Abstract). *Diabetes* 43 (Suppl. 1): 151A, 1994
